# Supplementary material for: Amphiphilic Graft Copolymers as Templates for the Generation of Binary Metal Oxide Mesoporous Interfacial Layers for Solid-State Photovoltaic Cells
Source: MDPI journal article supplement (doi:10.3390/nano14040352), 2024-02-13
Supplement: s1 [file s1]

<sup>1</sup> Department of Chemical Engineering, Konkuk University, 120 Neungdong-ro, Gwangjin-gu, Seoul 05029, Republic of Korea  
<sup>2</sup> Department of Chemical and Biomolecular Engineering, Yonsei University, 50 Yonsei-ro, Seodaemun-gu, Seoul 03722, Republic of Korea  
\* Correspondence: jtpark25@konkuk.ac.kr Tel: +82-2-450-3538, Fax: +82-2-450-8895

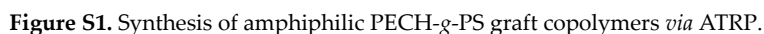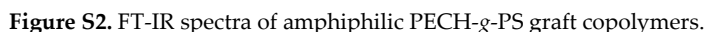

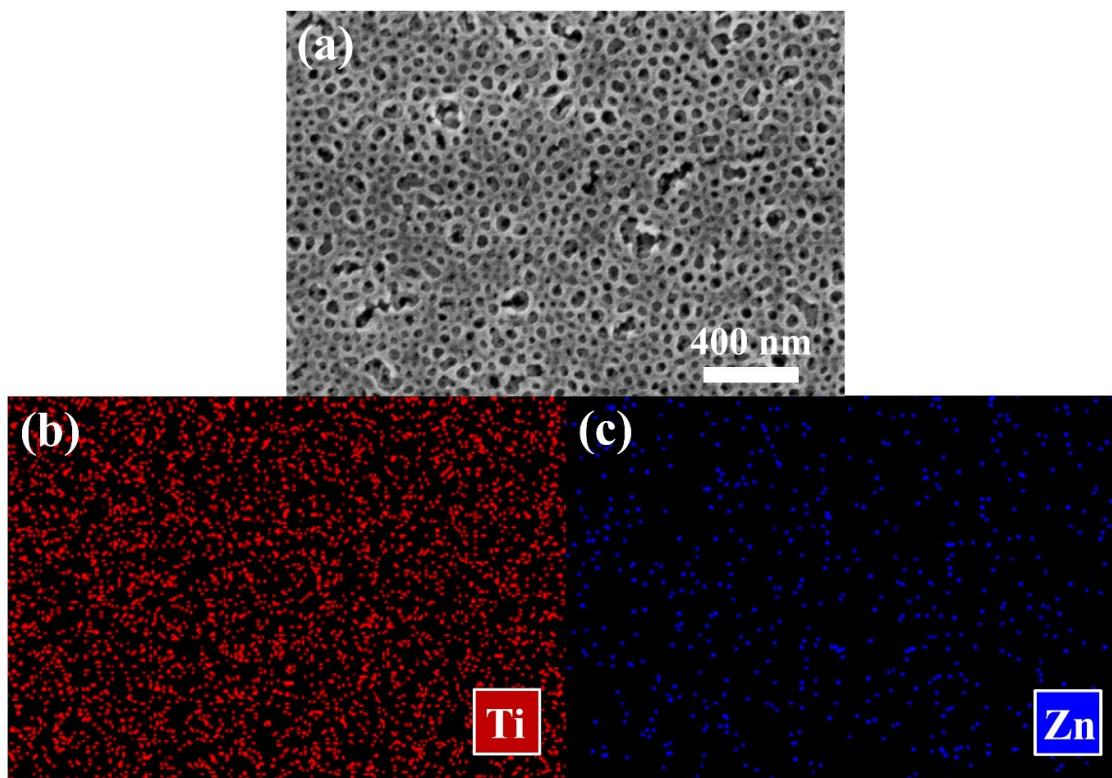

**Figure S3.** (a) SEM-EDS element mapping scan area, (b) Ti, and (c) Zn elemental maps of bi-MO meso IF layer TZ1.

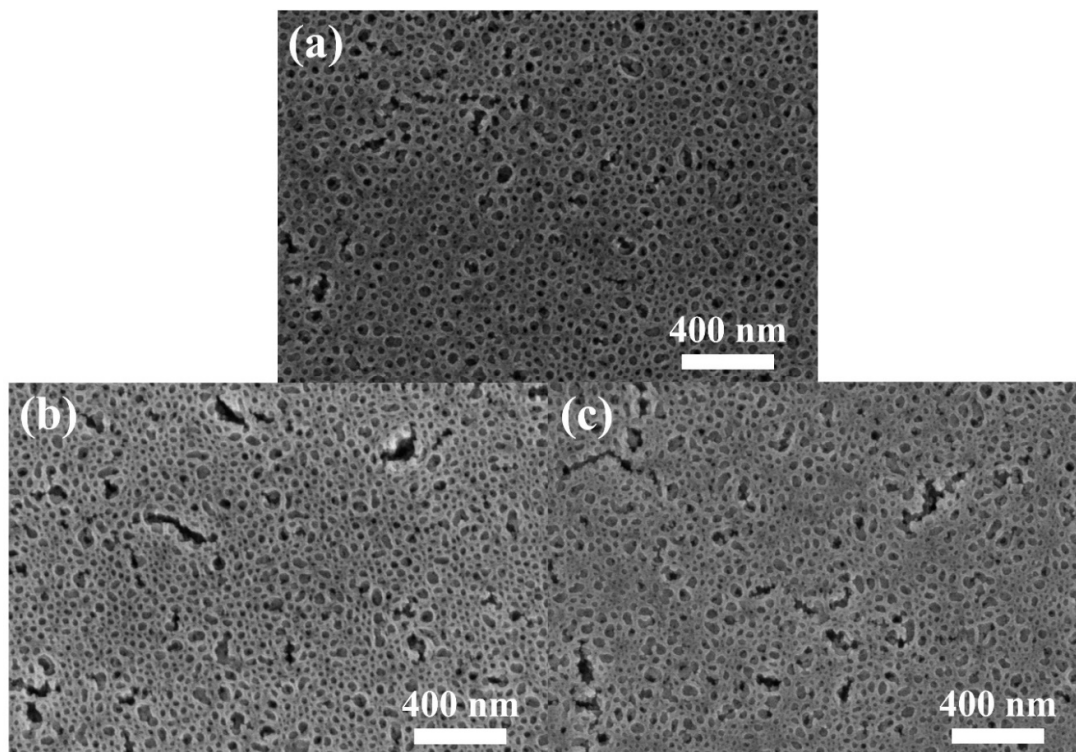

**Figure S4.** FE-SEM surface images of (a) bi-MO meso IF layer TZ0, (b) bi-MO meso IF layer TZ2 and (c) bi-MO meso IF layer TZ3.

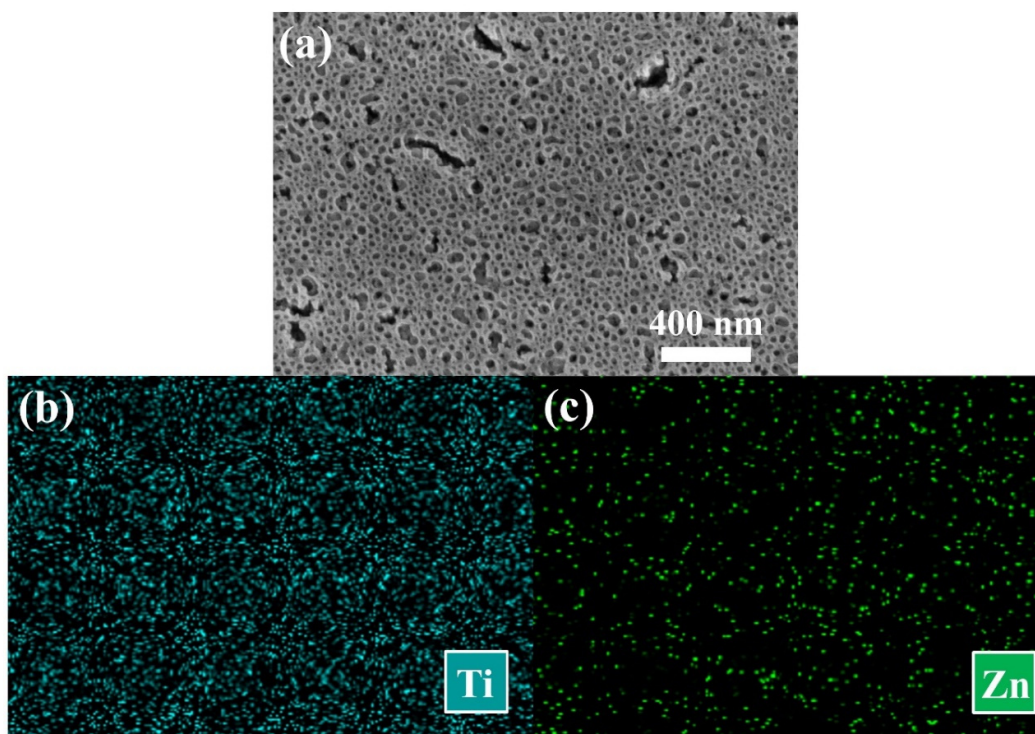

**Figure S5.** (a) SEM-EDS element mapping scan area, (b) Ti, and (c) Zn elemental maps of bi-MO meso IF layer TZ2.

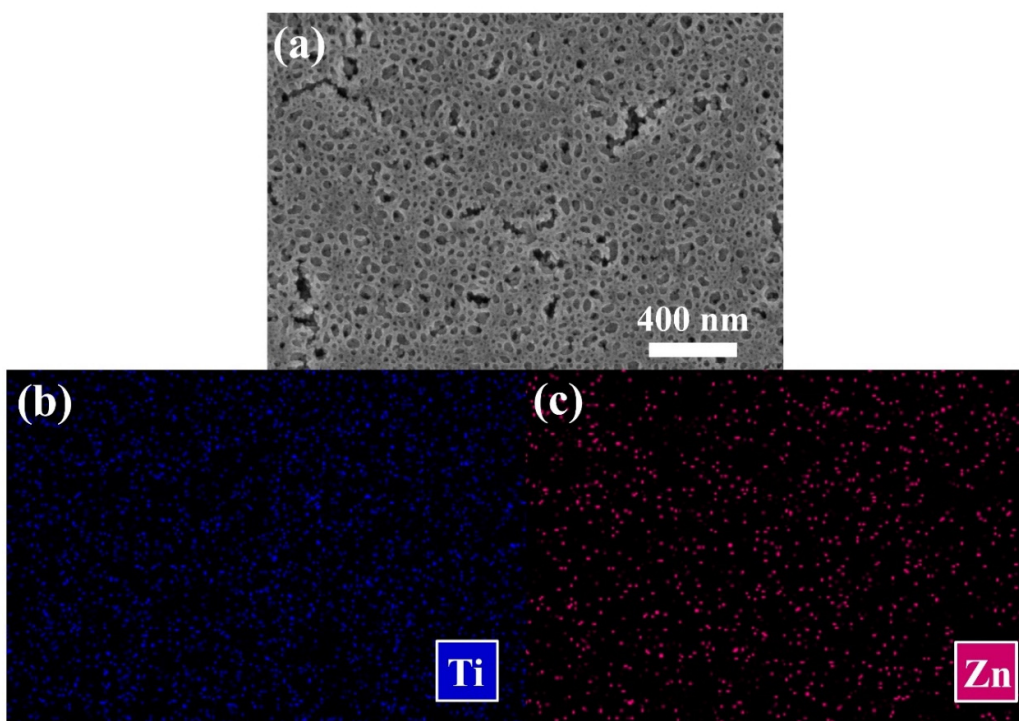

**Figure S6.** (a) SEM-EDS element mapping scan area, (b) Ti, and (c) Zn elemental maps of bi-MO meso IF layer TZ3.



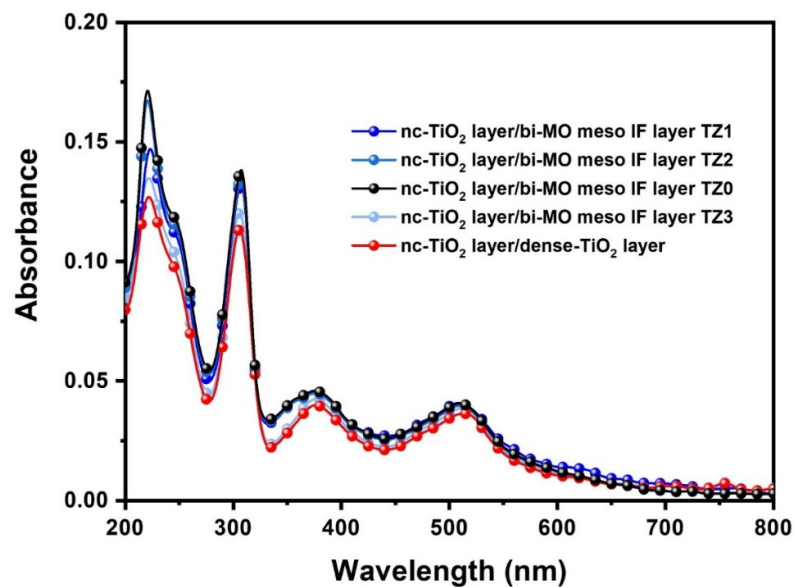

Figure S7. UV-visible spectra of N719 dye loading on bi-MO meso IF layer based solid state photovoltaic cells.

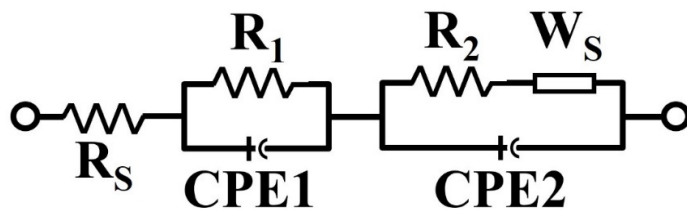

Figure S8. equivalent circuit diagram.

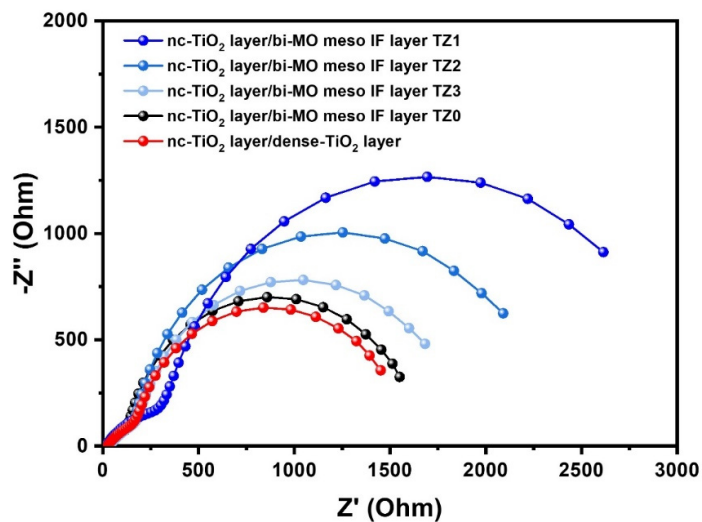

Figure S9. EIS Nyquist plots under dark condition.

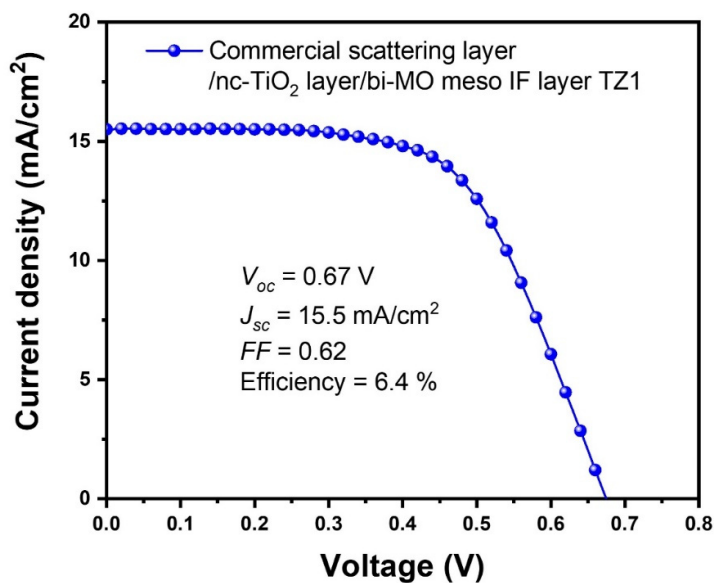

**Figure S10.**  $J$ - $V$  curves of bi-MO meso IF layer based solid state photovoltaic cells with commercial scattering layer under 1 sun illumination (AM 1.5 G, 100 mW/cm<sup>2</sup>).<sup>a,b,c,d</sup>.

<sup>a</sup> Solid-state electrolyte consists of PEG, LiI, MPPI, and I<sub>2</sub> in acetonitrile.

<sup>b</sup> The photoactive area for solid state photovoltaic cells was 0.16 cm<sup>2</sup>.

<sup>c</sup> The thickness of the photoanode was approximately 7 μm.

<sup>d</sup> The commercial scattering layer was approximately 5 μm thick.

**Table S1.** Comparison of photovoltaic parameters of solid state photovoltaic cells with mesoporous layer reported in the literature.

| Mesoporous Layer                        | Solid-State Electrolyte          | $V_{oc}$ (V) | $J_{sc}$ (mA/cm <sup>2</sup> ) | $FF$ | $\eta$ (%) | Reference |
|-----------------------------------------|----------------------------------|--------------|--------------------------------|------|------------|-----------|
| bi-MO meso IF layer                     | PEG                              | 0.74         | 9.8                            | 0.69 | 5.0        | This work |
| bi-MO meso IF layer w/ Scattering layer | PEG                              | 0.67         | 15.5                           | 0.62 | 6.4        | This work |
| Mesoporous TiO <sub>2</sub> bead        | HPC                              | 0.70         | 16.5                           | 0.67 | 7.8        | [48]      |
| TiO <sub>2</sub> film                   | MXene                            | 0.78         | 15.0                           | 0.66 | 7.8        | [49]      |
| TiO <sub>2</sub> film                   | Cs <sub>2</sub> SnI <sub>6</sub> | 0.62         | 10.62                          | 0.62 | 4.1        | [50]      |
| TiO <sub>2</sub> film                   | PEG/WO <sub>3</sub>              | 0.71         | 14.6                           | 0.61 | 6.3        | [51]      |
| TiO <sub>2</sub> film                   | PEG/ZrO <sub>2</sub>             | 0.66         | 14.0                           | 0.61 | 5.6        | [52]      |
| TiO <sub>2</sub> film                   | PEG                              | 0.64         | 13.6                           | 0.65 | 5.7        | [53]      |
| TiO <sub>2</sub> film                   | PEG/ZIF-67                       | 0.68         | 10.1                           | 0.65 | 4.6        | [54]      |
